# Supplementary material for: Associated impairments among children with cerebral palsy: findings from a cross-sectional hospital-based study in Vietnam
Source: PubMed Central journal article supplement — BMJ Open. 2024 Oct 26;14(10):e075820. doi: 10.1136/bmjopen-2023-075820 (PMC11535665; doi:10.1136/bmjopen-2023-075820), 2024-10-26
Supplement: bmjopen-14-10-s001.pdf [file bmjopen-14-10-s001.pdf]

## Supplementary

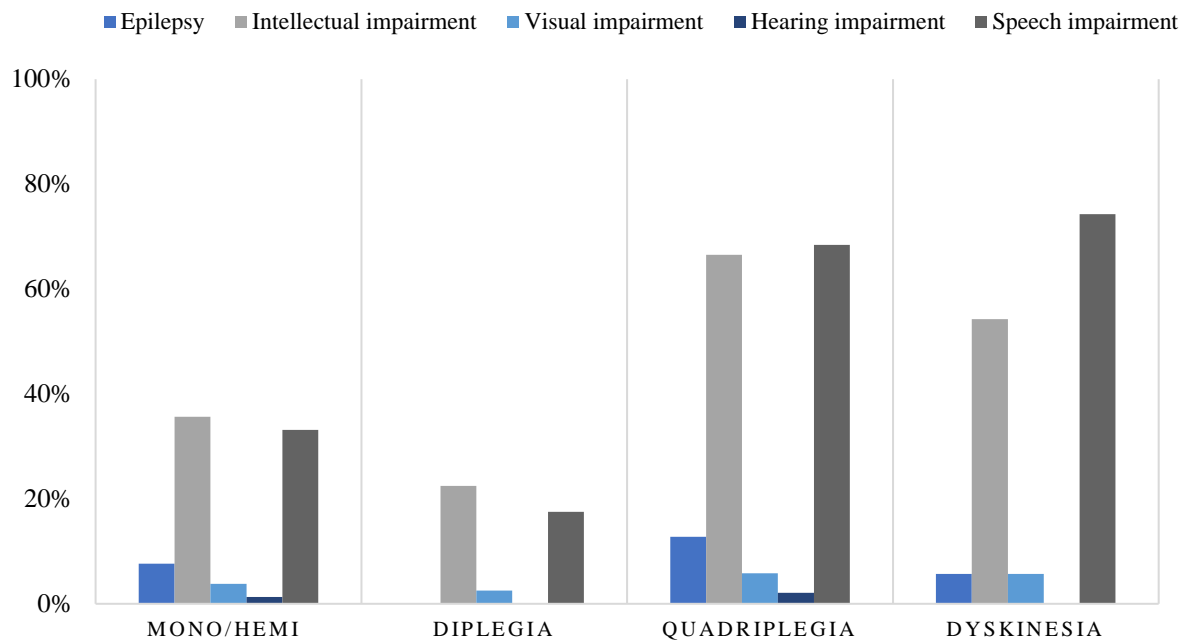

**Figure S1.** Associated impairments across CP types and distribution.

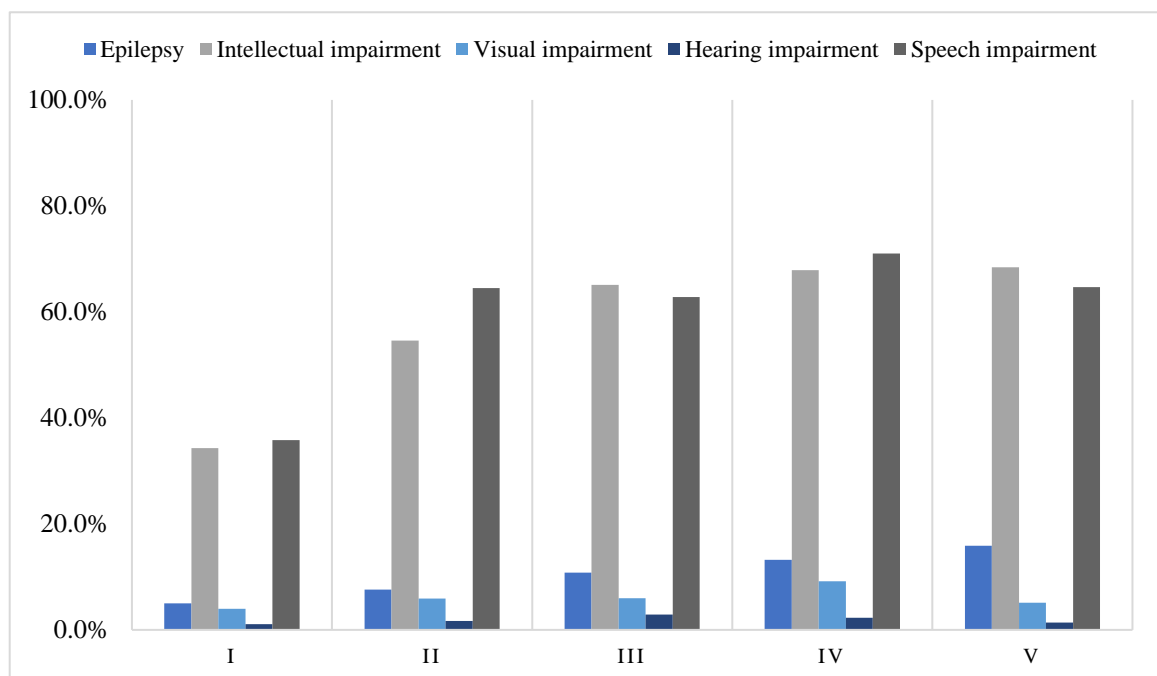

**Figure S2.** Associated impairments across GMFCS levels

**Table 3.** Association between associated impairments and factors (univariate logistic regression model).

| Characteristics               | Epilepsy        |                   |                          | Intellectual impairment |                   |                          | Visual impairment |                   |                          | Hearing impairment |                   |                          | Speech impairment |                    |                          |
|-------------------------------|-----------------|-------------------|--------------------------|-------------------------|-------------------|--------------------------|-------------------|-------------------|--------------------------|--------------------|-------------------|--------------------------|-------------------|--------------------|--------------------------|
|                               | Yes<br>(n=82)   | No<br>(n=676)     | Univariate<br>OR (95%CI) | Yes<br>(n=439)          | No<br>(n=320)     | Univariate<br>OR (95%CI) | Yes<br>(n=41)     | No<br>(n=702)     | Univariate<br>OR (95%CI) | Yes<br>(n=13)      | No<br>(n=747)     | Univariate<br>OR (95%CI) | Yes<br>(n=450)    | No<br>(n=312)      | Univariate<br>OR (95%CI) |
| Male                          | 50/82<br>(61.0) | 434/676<br>(64.2) | 1.15<br>(0.72-1.84)      | 286/439<br>(65.2)       | 201/320<br>(62.8) | 0.90<br>(0.67-1.22)      | 28/41<br>(68.3)   | 444/702<br>(63.2) | 0.8<br>(0.41-1.57)       | 5/13<br>(38.5)     | 482/747<br>(64.6) | 2.92<br>(0.95-9.02)      | 294/450<br>(65.3) | 195/312<br>(62.7)  | 0.9<br>(0.66-1.20)       |
| Female                        | 32/82<br>(39.0) | 242/676<br>(35.8) |                          | 153/439<br>(34.9)       | 119/320<br>(37.2) |                          | 13/41<br>(31.7)   | 258/702<br>(36.8) |                          | 8/13<br>(61.5)     | 264/747<br>(35.4) |                          | 156/450<br>(34.7) | 116/312<br>(37.3)  |                          |
| <b>Type of CP</b>             |                 |                   |                          |                         |                   |                          |                   |                   |                          |                    |                   |                          |                   |                    |                          |
| <b>Spastic</b>                |                 |                   |                          |                         |                   |                          |                   |                   |                          |                    |                   |                          |                   |                    |                          |
| Mono/hemi                     | 12/82<br>(14.6) | 145/676<br>(21.5) | 0.63<br>(0.33-1.19)      | 56/439<br>(12.8)        | 101/320<br>(31.6) | 0.32<br>(0.22-0.46)***   | 6/41<br>(14.6)    | 151/702<br>(21.5) | 0.63<br>(0.26-1.52)      | 2/13<br>(15.4)     | 155/747<br>(20.8) | 0.69<br>(0.15-3.17)      | 52/450<br>(11.6)  | 105/312<br>(33.7)  | 0.26<br>(0.18-0.37)***   |
| Diplegia                      | 0               | 39/676<br>(5.8)   | -                        | 9/439 (2.1)             | 30/320<br>(9.4)   | 0.20<br>(0.09-0.43)***   | 1/41<br>(2.4)     | 39/702<br>(5.6)   | 0.43<br>(0.06-3.18)      | 0                  | 40/747<br>(5.35)  | -                        | 7/450 (1.6)       | 33/312<br>(10.6)   | 0.13<br>(0.06-0.31)***   |
| Quadriplegia                  | 68/82<br>(82.9) | 458/676<br>(67.8) | 2.31<br>(1.27-4.20)**    | 354/439<br>(80.6)       | 173/320<br>(54.1) | 3.54<br>(2.56-4.89)***   | 31/41<br>(75.6)   | 482/702<br>(68.6) | 1.42<br>(0.68-2.95)      | 11/13<br>(84.6)    | 515/747<br>(68.9) | 2.48<br>(0.54-11.3)      | 364/450<br>(80.9) | 164/312<br>(52.6)  | 3.82<br>(2.76-5.28)***   |
| Ataxia                        | 0               | 1/676<br>(0.15)   | -                        | 1/439<br>(0.23)         | 0                 | -                        | 1/41<br>(2.44)    | 0                 | -                        | 0                  | 1/747<br>(0.13)   | -                        | 1/450<br>(0.22)   | 0                  | -                        |
| Dyskinesia                    | 2/82<br>(2.4)   | 33/676<br>(4.9)   | 0.49<br>(0.11-2.07)      | 19/439<br>(4.3)         | 16/320<br>(5.0)   | 0.86<br>(0.44-1.70)      | 2/41<br>(4.9)     | 30/702<br>(4.3)   | 1.15<br>(0.27-4.99)      | 0                  | 35/747<br>(4.7)   | -                        | 26/450<br>(5.78)  | 9/312<br>(2.88)    | 2.06<br>(0.95-4.47)      |
| <b>Associated impairments</b> |                 |                   |                          |                         |                   |                          |                   |                   |                          |                    |                   |                          |                   |                    |                          |
| Epilepsy                      |                 |                   |                          | 67/436<br>(15.4)        | 15/317<br>(4.7)   | 3.66<br>(2.05-6.53)***   | 7/41<br>(17.1)    | 72/698<br>(10.3)  | 1.79<br>(0.77-4.18)      | 3/12 (25)          | 77/742<br>(10.4)  | 2.88 (0.76-<br>10.9)     | 59/446<br>(13.23) | 22/310<br>(7.1)    | 2.0<br>(1.19-3.33)       |
| Intellectual                  | 67/82<br>(81.7) | 369/671<br>(55.0) | 3.66<br>(2.05-6.53)***   |                         |                   |                          | 33/41<br>(80.5)   | 392/698<br>(56.2) | 3.22<br>(1.47-7.07)**    | 12/13<br>(92.3)    | 423/742<br>(57)   | 9.05<br>(1.17-69.96)*    | 331/447<br>(74.1) | 106/310<br>(34.2)  | 5.49<br>(4.0-7.53)***    |
| Visual                        | 7/79<br>(8.9)   | 34/659<br>(5.2)   | 1.79<br>(0.76-4.18)      | 33/425<br>(7.8)         | 8/313<br>(2.6)    | 3.21<br>(1.46-7.05)**    |                   |                   |                          | 1/12<br>(8.3)      | 39/727<br>(5.4)   | 1.6<br>(0.2-12.74)       | 30/435<br>(6.9)   | 10/306<br>(3.3)    | 2.19<br>(1.06-4.56)*     |
| Hearing                       | 3/80<br>(3.8)   | 9/673<br>(1.3)    | 2.87<br>(0.76-10.84)     | 12/435<br>(2.8)         | 1/319<br>(0.3)    | 9.02<br>(1.17-69.74)*    | 1/40 (2.5)        | 1/699<br>(0.3)    | 1.6<br>(0.2-12.74)       |                    |                   |                          | 13/447<br>(2.91)  | 0                  | -                        |
| Speech                        | 59/81<br>(72.8) | 387/674<br>(57.4) | 1.99<br>(1.19-3.32)**    | 331/437<br>(75.7)       | 116/319<br>(36.4) | 5.46<br>(3.98-7.50)***   | 30/40<br>(75)     | 405/701<br>(57.8) | 2.19<br>(1.06-4.56)*     | 13/13<br>(100)     | 434/745<br>(58.3) | -                        |                   |                    |                          |
| <b>GMFCS level</b>            | 52/81<br>(64.2) | 297/667<br>(44.5) | 2.23<br>(1.38-3.61)**    | 238/431<br>(55.2)       | 111/318<br>(34.9) | 2.30<br>(1.71-3.10)***   | 20/40<br>(50)     | 320/694<br>(46.1) | 1.17<br>(0.62-2.21)      | 6/13<br>(46.2)     | 343/736<br>(46.6) | 0.98<br>(0.32-2.95)      | 234/440<br>(53.2) | 115/311<br>(36.98) | 1.93<br>(1.44-2.6)***    |

|                                                  |                 |                   |                      |                   |                   |                        |                  |                   |                      |                 |                   |                       |                    |                   |                       |
|--------------------------------------------------|-----------------|-------------------|----------------------|-------------------|-------------------|------------------------|------------------|-------------------|----------------------|-----------------|-------------------|-----------------------|--------------------|-------------------|-----------------------|
| <b>MACS level IV-V</b>                           | 3/20<br>(15.0)  | 15/168<br>(8.9)   | 1.80<br>(0.47-6.85)  | 15/95<br>(15.8)   | 3/91<br>(3.3)     | 5.50<br>(1.54-19.70)** | 3/13<br>(23.1)   | 12/169<br>(7.1)   | 3.90<br>(0.95-16.2)* | 0               | 18/184<br>(9.78)  | -                     | 16/97<br>(16.5)    | 2/91<br>(2.2)     | 8.79<br>(1.96-39.4)** |
| <b>Neuroimaging patterns</b>                     |                 |                   |                      |                   |                   |                        |                  |                   |                      |                 |                   |                       |                    |                   |                       |
| Normal                                           | 7/31<br>(22.6)  | 55/230<br>(23.9)  | 0.93<br>(0.38-2.27)  | 34/163<br>(20.9)  | 27/97<br>(27.8)   | 0.68<br>(0.38-1.22)    | 2/9 (22.2)       | 60/251<br>(23.9)  | 0.91<br>(0.18-4.5)   | 1/5 (20)        | 61/257<br>(23.7)  | 0.80<br>(0.09 – 7.32) | 35/169<br>(20.7)   | 27/94<br>(28.7)   | 0.65<br>(0.36-1.16)   |
| Miscellaneous                                    | 5/31<br>(16.1)  | 39/230<br>(17.0)  | 0.94<br>(0.34-2.60)  | 31/163<br>(19.0)  | 13/97<br>(13.4)   | 1.52<br>(0.75-3.07)    | 1/9 (11.1)       | 42/251<br>(16.7)  | 0.62<br>(0.08-5.11)  | 1/5 (20)        | 43/257<br>(16.7)  | 1.24<br>(0.14 – 11.4) | 35/169<br>(20.7)   | 9/94<br>(9.6)     | 2.47<br>(1.13-5.4)*   |
| Predominant grey matter injury                   | 3/31<br>(9.7)   | 22/230<br>(9.6)   | 1.01<br>(0.28-3.60)  | 18/163<br>(11.0)  | 7/97<br>(7.2)     | 1.60<br>(0.64-3.97)    | 2/9 (22.2)       | 23/251<br>(9.2)   | 2.83<br>(0.56-14.4)  | 1/5 (20)        | 23/257<br>(8.95)  | 2.54<br>(0.27 – 23.7) | 17/169<br>(10.1)   | 8/84<br>(8.51)    | 1.2<br>(0.5-2.9)      |
| Predominant white matter injury                  | 2/33<br>(6.1)   | 30/260<br>(11.5)  | 0.49<br>(0.11-2.17)  | 12/175<br>(6.9)   | 19/116<br>(16.4)  | 0.38<br>(0.17-0.81)    | 1/10 (10)        | 30/281<br>(10.7)  | 0.93<br>(0.11-7.59)  | 0               | 32/289<br>(11.1)  | -                     | 24/193<br>(12.4)   | 8/102<br>(7.84)   | 1.67<br>(0.72-3.86)   |
| Maldevelopment s                                 | 4/31<br>(14.3)  | 10/230<br>(4.5)   | 3.26<br>(0.96-11.1)* | 8/163 (4.9)       | 6/97<br>(6.2)     | 0.78<br>(0.26-2.33)    | 0                | 14/251<br>(5.6)   | -                    | 0               | 14/257<br>(5.5)   | -                     | 7/169<br>(4.14)    | 7/94<br>(7.5)     | 0.54<br>(0.18-1.58)   |
| <b>Maternal febrile illness during pregnancy</b> | 10/82<br>(12.2) | 92/673<br>(13.7)  | 0.88<br>(0.44-1.76)  | 58/437<br>(13.3)  | 44/230<br>(13.8)  | 0.96<br>(0.63-1.46)    | 3/41 (7.3)       | 94/700<br>(13.9)  | 0.49<br>(0.15-1.62)  | 1/13<br>(7.7)   | 101/744<br>(13.6) | 0.53<br>(0.07 – 4.12) | 51/447<br>(11.4)   | 51/312<br>(16.4)  | 0.66<br>(0.43-1)      |
| <b>Mode of delivery</b>                          |                 |                   |                      |                   |                   |                        |                  |                   |                      |                 |                   |                       |                    |                   |                       |
| Vaginal birth                                    | 53/82<br>(64.6) | 448/668<br>(67.1) | 0.90<br>(0.56-1.45)  | 291/433<br>(67.2) | 291/318<br>(67.2) | 1.06<br>(0.79-1.45)    | 25/40<br>(62.5)  | 464/695<br>(66.8) | 0.83<br>(0.43-1.6)   | 8/13<br>(61.5)  | 492/738<br>(66.7) | 0.8<br>(0.26 – 2.47)  | 298/445<br>(67)    | 204/308<br>(66.2) | 1.03<br>(0.76-1.41)   |
| Caesarean section                                | 28/82<br>(34.1) | 207/668<br>(31.0) | 1.15<br>(0.71-1.88)  | 133/433<br>(30.7) | 104/318<br>(32.7) | 0.91<br>(0.67-1.24)    | 14/40<br>(35)    | 219/695<br>(31.5) | 1.17<br>(0.6-0.08)   | 5/13<br>(38.5)  | 232/738<br>(31.4) | 1.36<br>(0.44 – 4.21) | 136/445<br>(30.6)  | 101/308<br>(32.8) | 0.9<br>(0.66-1.23)    |
| <b>Gestational age</b>                           |                 |                   |                      |                   |                   |                        |                  |                   |                      |                 |                   |                       |                    |                   |                       |
| Term (≥37–41 weeks)                              | 60/82<br>(73.2) | 477/674<br>(70.8) | 1.13<br>(0.67-1.89)  | 323/437<br>(73.9) | 213/320<br>(66.6) | 1.42<br>(1.04-1.95)*   | 29/41<br>(70.7)  | 497/700<br>(71)   | 0.99<br>(0.49-1.97)  | 11/13<br>(84.6) | 527/744<br>(70.8) | 2.26<br>(0.50 – 10.3) | 327/448<br>(73)    | 212/311<br>(68.2) | 1.26<br>(0.92-1.73)   |
| Preterm (≤36 weeks)                              | 20/82<br>(24.4) | 180/674<br>(26.7) | 0.89<br>(0.52-1.51)  | 105/437<br>(24.0) | 97/320<br>(30.3)  | 0.73<br>(0.53-1.01)    | 12/41<br>(29.3)  | 184/700<br>(26.3) | 1.16<br>(0.58-2.32)  | 2/13<br>(15.4)  | 198/744<br>(26.6) | 0.50<br>(0.11 - 2.28) | 112/448<br>(25)    | 89/311<br>(28.6)  | 0.83<br>(0.6-1.15)    |
| <b>Birth weight</b>                              |                 |                   |                      |                   |                   |                        |                  |                   |                      |                 |                   |                       |                    |                   |                       |
| <b>Low birth weight (&lt;2500gram)</b>           | 16/82<br>(19.5) | 182/673<br>(27.0) | 0.65<br>(0.37-1.16)  | 111/437<br>(25.4) | 89/319<br>(27.9)  | 0.88<br>(0.64-1.22)    | 16/41<br>(39.02) | 181/699<br>(25.9) | 1.83<br>(0.96-3.51)  | 2/13<br>(15.4)  | 196/743<br>(26.4) | 0.51<br>(0.11 – 2.31) | 116/447<br>(26)    | 84/311<br>(27.01) | 0.95<br>(0.68-1.31)   |
| <b>Timing of injury causing CP</b>               |                 |                   |                      |                   |                   |                        |                  |                   |                      |                 |                   |                       |                    |                   |                       |
| Pre/ Perinatal                                   | 37/82<br>(45.1) | 376/676<br>(55.6) | 0.66<br>(0.41-1.04)  | 240/439<br>(54.7) | 175/320<br>(54.7) | 1.00<br>(0.75-1.34)    | 24/41<br>(58.5)  | 379/702<br>(53.9) | 1.21<br>(0.64-2.29)  | 5/13<br>(38.5)  | 408/747<br>(54.6) | 0.52<br>(0.17 – 1.60) | 251/450<br>(55.80) | 165/312<br>(52.9) | 1.12<br>(0.84-1.5)    |

|                           |                 |                   |                        |                   |                   |                      |                 |                   |                      |                |                   |                       |                   |                   |                       |
|---------------------------|-----------------|-------------------|------------------------|-------------------|-------------------|----------------------|-----------------|-------------------|----------------------|----------------|-------------------|-----------------------|-------------------|-------------------|-----------------------|
| Postneonatal              | 28/82<br>(34.2) | 69/676<br>(10.2)  | 4.56<br>(2.71-7.67)*** | 65/439<br>(14.8)  | 33/320<br>(10.3)  | 1.51<br>(0.97-2.36)  | 9/41<br>(22.0)  | 86/702<br>(12.2)  | 2.02<br>(0.93-4.37)  | 4/13<br>(30.8) | 93/747<br>(12.5)  | 3.12<br>(0.94 – 10.3) | 58/450<br>(12.89) | 39/312<br>(12.5)  | 1.03<br>(0.67-1.6)    |
| Unknown                   | 17/82<br>(20.7) | 231/676<br>(34.2) | 0.50<br>(0.29-0.88)*   | 134/439<br>(30.5) | 112/320<br>(35.0) | 0.82<br>(0.60-1.11)  | 8/41<br>(19.5)  | 237/702<br>(33.7) | 0.48<br>(0.22-1.05)  | 4/13<br>(30.8) | 245/747<br>(32.8) | 0.91<br>(0.28 – 2.98) | 141/450<br>(31.3) | 107/312<br>(34.3) | 0.87<br>(0.64-1.19)   |
| <b>Perinatal asphyxia</b> | 34/81<br>(42.0) | 239/673<br>(35.5) | 1.31<br>(0.82-2.10)    | 162/435<br>(37.2) | 113/320<br>(35.3) | 1.09<br>(0.80-1.47)  | 21/41<br>(51.2) | 243/699<br>(34.8) | 1.97<br>(1.05-3.71)* | 5/13<br>(38.5) | 268/743<br>(36.1) | 0.52<br>(0.17 – 1.60) | 184/446<br>(41.2) | 91/312<br>(29.2)  | 1.71<br>(1.25-2.32)** |
| <b>Neonatal jaundice</b>  | 5/82<br>(6.1)   | 74/676<br>(11.0)  | 0.53<br>(0.21-1.35)    | 47/439<br>(10.7)  | 32/320<br>(10.0)  | 1.08<br>(0.67-1.73)  | 2/41 (4.9)      | 75/702<br>(10.7)  | 0.43<br>(0.10-1.81)  | 1/13<br>(7.7)  | 80/747<br>(10.7)  | 3.12<br>(0.94 – 10.3) | 51/450<br>(11.3)  | 29/312<br>(9.3)   | 1.25<br>(0.77-2.02)   |
| <b>Maternal infection</b> | 9/82<br>(11.0)  | 58/676<br>(8.6)   | 1.31<br>(0.62-2.76)    | 44/439<br>(10.0)  | 25/320<br>(7.8)   | 1.31<br>(0.79-2.20)  | 3/41<br>(7.32)  | 61/702<br>(8.7)   | 0.83<br>(0.25-2.77)  | 3/13<br>(23.1) | 65/747<br>(8.7)   | 0.91<br>(0.28 – 2.98) | 47/450<br>(10.4)  | 22/311<br>(7.1)   | 1.53<br>(0.9-2.6)     |
| <b>Consanguinity</b>      | 75/77<br>(97.4) | 652/661<br>(98.6) | 1.93<br>(0.41-9.11)    | 8/429 (1.9)       | 3/310<br>(1.0)    | 1.94<br>(0.51-7.34)  | 0               | 11/687<br>(1.6)   | -                    | 0              | 11/726<br>(1.52)  | -                     | 8/442 (1.4)       | 5/299<br>(1.7)    | 0.81<br>(0.24-2.68)   |
| <b>Multiple birth</b>     | 75/79<br>(94.9) | 611/648<br>(94.3) | 0.88<br>(0.31-2.53)    | 17/429<br>(4.0)   | 24/310<br>(7.8)   | 0.50<br>(0.26-0.94)* | 3/41<br>(7.32)  | 36/672<br>(5.4)   | 1.39<br>(0.41-4.74)  | 0              | 42/716<br>(5.87)  | -                     | 24/434<br>(5.5)   | 18/296<br>(6.1)   | 0.9<br>(0.48-1.7)     |

n (%) is presented for categorical variables.

Chi square test and Fisher's Exact test were used for comparison between groups and for *p*-value (2-sided). \**p*<0.05, \*\**p*<0.01, \*\*\**p*<0.001

**Table S1.** Association between associated impairments and anthropometric characteristics (univariate logistic regression model).

| Characteristics               | Epilepsy        |                   |                          | Intellectual      |                   |                          | Visual          |                   |                          | Hearing        |                    |                          | Speech            |                   |                          |
|-------------------------------|-----------------|-------------------|--------------------------|-------------------|-------------------|--------------------------|-----------------|-------------------|--------------------------|----------------|--------------------|--------------------------|-------------------|-------------------|--------------------------|
|                               | Yes<br>(n=82)   | No<br>(n=676)     | Univariate<br>OR (95%CI) | Yes<br>(n=439)    | No<br>(n=320)     | Univariate<br>OR (95%CI) | Yes<br>(n=41)   | No<br>(n=702)     | Univariate<br>OR (95%CI) | Yes<br>(n=13)  | No<br>(n=747)      | Univariate<br>OR (95%CI) | Yes<br>(n=450)    | No<br>(n=312)     | Univariate<br>OR (95%CI) |
| <b>Weight-for-age z score</b> |                 |                   |                          |                   |                   |                          |                 |                   |                          |                |                    |                          |                   |                   |                          |
| Normal                        | 54/79<br>(68.4) | 465/652<br>(71.3) | 1                        | 283/425<br>(66.6) | 237/307<br>(77.2) | 1                        | 25/40<br>(62.5) | 484/676<br>(71.6) | 1                        | 6/13<br>(46.2) | 515/719<br>(71.6)  | 1                        | 304/441<br>(68.9) | 217/293<br>(74.1) | 1                        |
| Moderate<br>underweight       | 13/79<br>(16.5) | 125/652<br>(19.2) | 0.90<br>(0.47-1.69)      | 92/425 (21.6)     | 47/307<br>(15.3)  | 1.63<br>(1.11-2.42)**    | 12/40<br>(30.0) | 122/676<br>(18.1) | 1.9<br>(0.93-3.9)        | 6/13<br>(46.2) | 131/719<br>(18.2)  | 3.90<br>(1.25-12.4)*     | 87/441<br>(19.7)  | 52/293<br>(17.8)  | 1.19<br>(0.81-1.75)      |
| Severe<br>underweight         | 12/79<br>(15.2) | 62/652<br>(9.5)   | 1.67<br>(0.84-3.29)      | 50/425 (11.8)     | 23/307<br>(7.5)   | 1.82<br>(1.08-3.07)**    | 3/40 (7.5)      | 70/676<br>(10.4)  | 0.83<br>(0.24-2.8)       | 1/13<br>(7.69) | 73/719<br>(10.2)   | 1.18<br>(0.14-9.91)      | 50/441<br>(11.3)  | 24/293<br>(8.2)   | 1.49<br>(0.89-2.49)      |
| <b>Height-for-age z score</b> |                 |                   |                          |                   |                   |                          |                 |                   |                          |                |                    |                          |                   |                   |                          |
| Normal                        | 48/78<br>(61.5) | 391/632<br>(61.9) | 1                        | 239/417<br>(57.3) | 199/295<br>(67.5) | 1                        | 20/40<br>(50.0) | 410/656<br>(62.5) | 1                        | 9/13<br>(69.2) | 432/698<br>(61.89) | 1                        | 244/415<br>(58.8) | 197/298<br>(66.1) | 1                        |
| Stunted                       | 13/78<br>(16.7) | 97/632<br>(15.4)  | 1.09<br>(0.57-2.10)      | 72/417<br>(17.3)  | 39/295<br>(13.2)  | 1.54<br>(1.00-2.37)      | 10/40<br>(25.0) | 96/656<br>(14.6)  | 2.14<br>(0.97-4.71)      | 2/13<br>(15.4) | 107/698<br>(15.3)  | 0.9<br>(0.19-4.21)       | 71/415<br>(17.1)  | 40/298<br>(13.4)  | 1.43<br>(0.93-2.2)       |
| Moderate                      | 9/78<br>(11.5)  | 93/632<br>(14.7)  | 0.79<br>(0.37-1.66)      | 72/417<br>(17.3)  | 31/295<br>(10.5)  | 1.93<br>(1.22-2.07)*     | 8/40<br>(20.0)  | 93/656<br>(14.2)  | 1.76<br>(0.75-4.13)      | 2/13<br>(15.4) | 101/698<br>(14.5)  | 0.95<br>(0.2-4.47)       | 64/415<br>(15.4)  | 39/298<br>(13.1)  | 1.32<br>(0.85-2.06)      |

|                                  |                       |                   |                     |                   |                   |                      |                 |                   |                      |           |                   |                     |                   |                   |                     |
|----------------------------------|-----------------------|-------------------|---------------------|-------------------|-------------------|----------------------|-----------------|-------------------|----------------------|-----------|-------------------|---------------------|-------------------|-------------------|---------------------|
| Severe                           | 8/78<br>(10.3)        | 51/632<br>(8.1)   | 1.28<br>(0.57-2.85) | 34/417 (8.1)      | 26/295<br>(8.8)   | 1.09<br>(0.63-1.88)  | 2/40 (5.0)      | 57/656<br>(8.7)   | 0.72<br>(0.16-3.16)  | 0         | 58/698<br>(8.3)   | -                   | 36/415<br>(8.67)  | 22/298<br>(7.4)   | 1.32<br>(0.75-2.31) |
| <b>Weight-for-height z score</b> |                       |                   |                     |                   |                   |                      |                 |                   |                      |           |                   |                     |                   |                   |                     |
| Normal                           | 229/35<br>1<br>(65.2) | 167/225<br>(74.2) | 1                   | 231/349<br>(66.2) | 163/226<br>(72.1) | 1                    | 19/31<br>(61.3) | 368/531<br>(69.3) | 1                    | 8/10 (80) | 388/565<br>(68.7) | 1                   | 229/351<br>(65.2) | 167/225<br>(74.2) | 1                   |
| Wasted                           | 44/351<br>(12.5)      | 19/225<br>(8.4)   | 1.69<br>(0.95-3)    | 44/349<br>(12.6)  | 20/226<br>(8.8)   | 1.55<br>(0.88-2.73)  | 8/31<br>(25.8)  | 56/531<br>(10.6)  | 2.77<br>(1.16-6.62)* | 1/10 (10) | 62/565<br>(10.97) | 0.78 (0.1-<br>6.36) | 44/351<br>(12.5)  | 19/225<br>(8.4)   | 1.69<br>(0.95-3)    |
| Moderate                         | 56/351<br>(16)        | 23/225<br>(10.2)  | 1.78<br>(1.05-3)    | 51/349<br>(14.6)  | 29/226<br>(12.8)  | 1.24<br>(0.75-2.04)  | 1/31<br>(3.2)   | 75/531<br>(14.1)  | 0.26<br>(0.03-1.96)  | 1/10 (10) | 77/565<br>(13.6)  | 0.63<br>(0.08-5.11) | 56/351 (16)       | 23/225<br>(10.2)  | 1.78<br>(1.05-3)    |
| Severe                           | 22/351<br>(6.3)       | 16/225<br>(7.1)   | 1<br>(0.51-1.97)    | 23/349 (6.6)      | 14/226<br>(6.2)   | 1.16<br>(0.58-2.32)  | 3/31<br>(9.7)   | 32/531<br>(6)     | 1.82<br>(0.51-6.5)   | 0         | 38/565<br>(6.7)   | -                   | 22/351<br>(6.3)   | 16/225<br>(7.1)   | 1<br>(0.51-1.97)    |
| <b>Head circumference</b>        |                       |                   |                     |                   |                   |                      |                 |                   |                      |           |                   |                     |                   |                   |                     |
| Normocephalic                    | 156/38<br>4<br>(40.6) | 110/243<br>(45.3) | 1                   | 145 (39.0)        | 120<br>(47.4)     | 1                    | 12/32<br>(37.5) | 249/580<br>(42.9) | 1                    | 6/10 (60) | 261/616<br>(42.4) | 1                   | 156/384<br>(40.6) | 110/243<br>(45.3) | 1                   |
| Microcephalic                    | 218/38<br>4<br>(56.8) | 122/243<br>(50.2) | 0.79<br>(0.57-1.1)  | 215 (57.8)        | 124<br>(49.0)     | 0.7 (0.5-0.97)       | 19/32<br>(59.4) | 312/580<br>(53.8) | 0.79 (0.38-1.66)     | 3/10 (30) | 335/616<br>(54.4) | 0.79<br>(0.38-1.66) | 218/384<br>(56.8) | 122/243<br>(50.2) | 0.79<br>(0.57-1.1)  |
| Macrocephalic                    | 10/384<br>(2.6)       | 11/243<br>(4.5)   | 0.51<br>(0.21-1.23) | 12 (3.2)          | 9 (3.6)           | 0.77 (0.31-<br>1.88) | 1/32<br>(3.1)   | 19/580<br>(3.3)   | 0.86 (0.11-6.81)     | 1/10 (10) | 20/616<br>(3.25)  | 0.86<br>(0.11-6.81) | 10/384<br>(2.6)   | 11/243<br>(4.5)   | 0.51<br>(0.21-1.23) |

n (%) is presented for categorical variables.

Chi square test and Fisher's Exact test were used for comparison between groups and for *p*-value (2-sided). \**p*<0.05, \*\**p*<0.01
